# Supplementary material for: Engineering and Characterization of Antibacterial Coaxial Nanofiber Membranes for Oil/Water Separation
Source: Polymers (Basel). 2020 Nov 5;12(11):2597. doi: 10.3390/polym12112597 (PMC7694370; doi:10.3390/polym12112597)
Supplement: Supplementary file 1 [file polymers-12-02597-s001.pdf]

Supporting information of:

## **Engineering and Characterization of Antibacterial Coaxial Nanofibers**

### **Membranes for Oil/Water Separation**

Hamouda M. Mousa<sup>1, \*</sup>, Husain Alfadhel<sup>2</sup>, Emad Abouel Nasr<sup>3,4</sup>

<sup>1</sup>Department of Mechanical Engineering, Faculty of Engineering, South Valley University, Qena 83523, Egypt.

<sup>2</sup>Department of Mechanical Engineering, University of Portsmouth, UK.

<sup>3</sup>Department of Industrial Engineering, College of Engineering, King Saud University, Riyadh 11421, Saudi Arabia.

<sup>4</sup>Department of Mechanical Engineering, Faculty of Engineering, Helwan University, Cairo 11732, Egypt.

\* Author to whom correspondence should be addressed.

E-Mail: H. M. Mousa ([hmousa@eng.svu.edu.eg](mailto:hmousa@eng.svu.edu.eg))

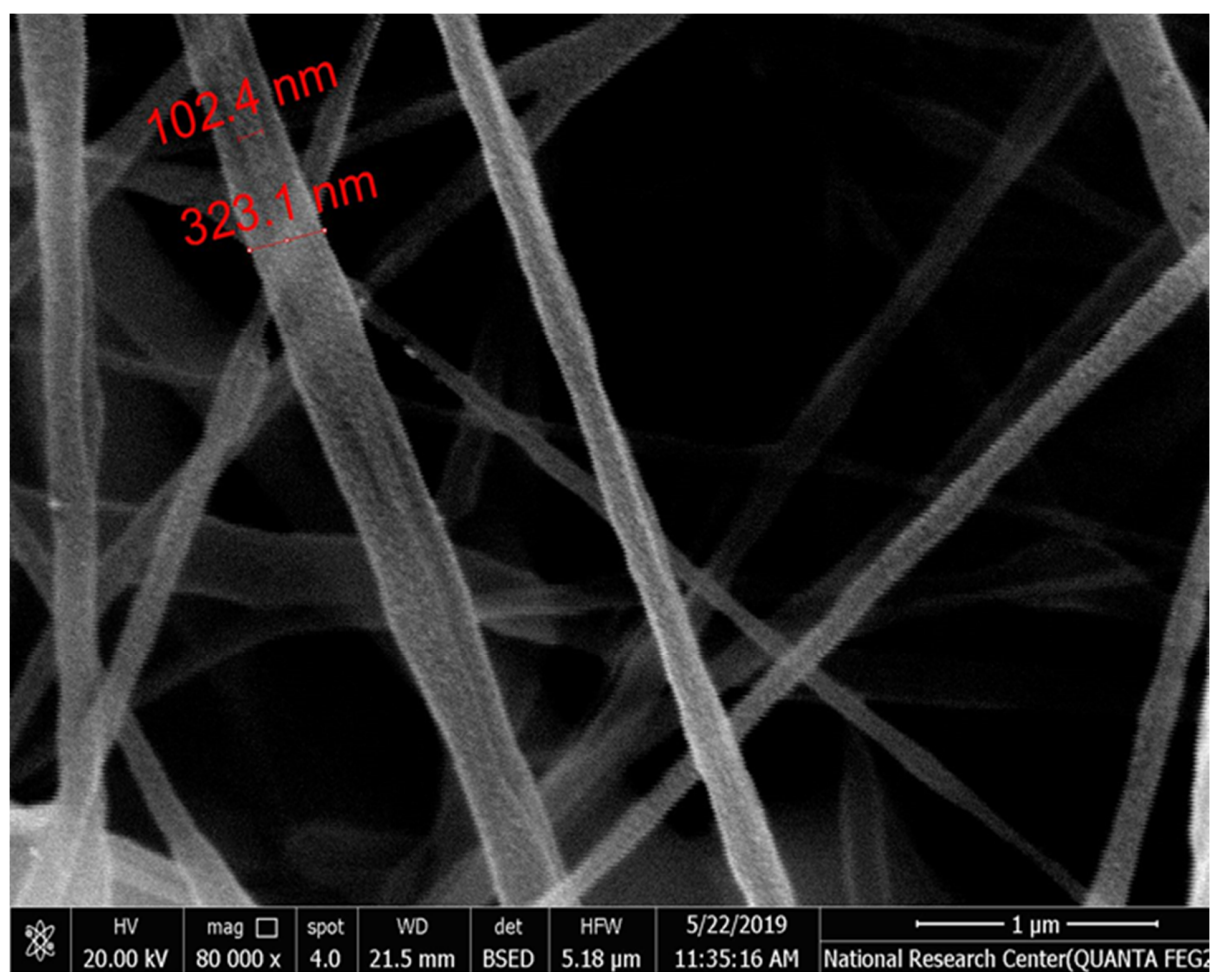

**Fig.S1** high resolution image of coaxial nanofiber membrane.

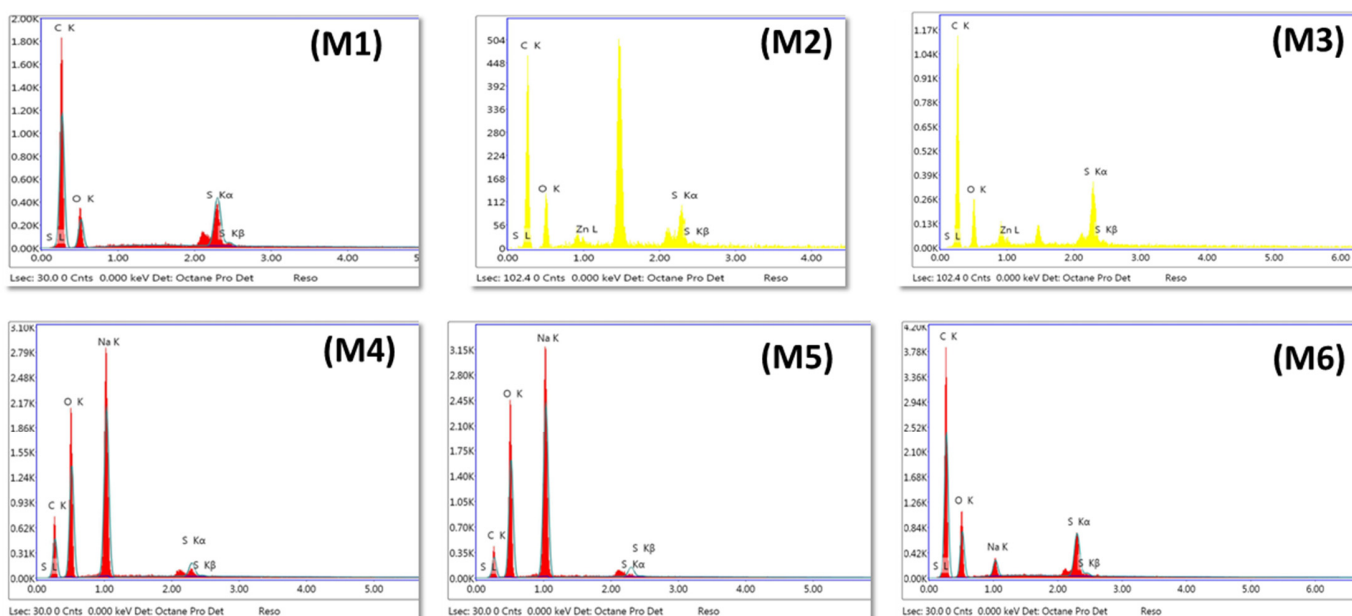

**Fig.S2** EDS point analysis of the electrospun co-axial nanofibers membranes before and after surface treatment.

| (M1)    |          |          |          |         | (M2)    |          |          |          |                | (M3)    |          |          |          |                |
|---------|----------|----------|----------|---------|---------|----------|----------|----------|----------------|---------|----------|----------|----------|----------------|
| Element | Weight % | Atomic % | Net Int. | Error % | Element | Weight % | Atomic % | Net Int. | Net Int. Error | Element | Weight % | Atomic % | Net Int. | Net Int. Error |
| C K     | 71.66    | 78.83    | 282.63   | 7.86    | C K     | 65.05    | 74.89    | 19.9     | 0.03           | C K     | 68.64    | 78.45    | 49.6     | 0.02           |
| O K     | 22.93    | 18.94    | 64.05    | 12.52   | O K     | 25.48    | 22.03    | 6.7      | 0.05           | O K     | 21.19    | 18.18    | 12.9     | 0.03           |
| S K     | 5.41     | 2.23     | 148.31   | 3.03    | S K     | 4.91     | 2.12     | 11.3     | 0.05           | S K     | 5.68     | 2.43     | 32.2     | 0.03           |
|         |          |          |          |         | Zn K    | 4.56     | 0.96     | 1.5      | 0.18           | Zn K    | 4.49     | 0.94     | 3.7      | 0.17           |
| (M4)    |          |          |          |         | (M5)    |          |          |          |                | (M6)    |          |          |          |                |
| Element | Weight % | Atomic % | Net Int. | Error % | Element | Weight % | Atomic % | Net Int. | Net Int. Error | Element | Weight % | Atomic % | Net Int. | Net Int. Error |
| C K     | 28.74    | 38.52    | 117.07   | 10.1    | C K     | 20.32    | 28.61    | 68.59    | 11.06          | C K     | 64.7     | 72.7     | 583.45   | 7.43           |
| O K     | 38.83    | 39.07    | 358.04   | 9.21    | O K     | 40.65    | 42.97    | 419.91   | 8.52           | O K     | 28.27    | 23.85    | 198.95   | 11             |
| Na K    | 30.9     | 21.64    | 595.94   | 7.35    | Na K    | 37.65    | 27.69    | 681.66   | 7.2            | Na K    | 2.94     | 1.73     | 77.53    | 9.51           |
| S K     | 1.53     | 0.77     | 56.33    | 9.13    | S K     | 1.37     | 0.72     | 44.98    | 9.69           | S K     | 4.09     | 1.72     | 248.88   | 2.77           |

**Fig.S3** EDS point analysis of the electrospun co-axial nanofibers membranes before and after surface treatment in terms of weight and atomic percent.
